# Supplementary material for: Enhanced fluorescence of functionalized silica microsphere based on whispering gallery mode for nitrate ester explosives and hexogen vapour detection
Source: Royal Society of Chemistry journal article supplement (doi:10.1039/c6tc05642c), 2017-01-01
Supplement: c6tc05642c1.pdf [file c6tc05642c1.pdf]

# **Electronic Supplementary Information (ESI) for**

## **Enhanced Fluorescence of Functionalized Silica Microsphere based on Whispering Gallery Mode for Nitrate Ester Explosives and Hexogen Vapour Detection**

*Xiangtao Zhang,<sup>1,2</sup> Defeng Zhu,<sup>1</sup> Yanyan Fu,<sup>1</sup> Qingguo He,<sup>\*1</sup> Huimin Cao,<sup>1</sup> Wei Li,<sup>1</sup> Jiangong*

*Cheng<sup>\*1</sup>*

1. State Key Lab of Transducer Technology, Shanghai Institute of Microsystem and Information Technology, Chinese Academy of Sciences, Shanghai 200050
2. Graduate School of Chinese Academy of Sciences, Beijing 100049, P. R. China

# Catalogue

|                                                                                                                                                                 |    |
|-----------------------------------------------------------------------------------------------------------------------------------------------------------------|----|
| 1. Synthesis of fluorophore sensing units and hollow-shell silica microsphere .....                                                                             | 3  |
| 2. NMR and mass spectrum of two fluorophores TPA-Py-Br and NPC-Py-Br .....                                                                                      | 3  |
| 3. Fourier transforms infrared spectra of the hybrid silica microsphere .....                                                                                   | 4  |
| 4. Solid-state <sup>29</sup> Si and <sup>13</sup> C cross-polarization magic-angle spinning NMR spectrum .....                                                  | 5  |
| 5. SEM of sensing films of silica microspheres and their corresponding fluorophores .....                                                                       | 6  |
| 6. Fluorescence spectrum comparison between dye-functionalized microsphere and vinyl-modified microsphere spin coated with fluorophore. ....                    | 7  |
| 7. Fluorescent quenching efficiency and photobleaching behavior of the silica-based films by different film preparation methods. ....                           | 8  |
| 8. TGA curve of the hybrid silica-based microspheres: (a) TPA-Py-SiO <sub>2</sub> (b) NPC-Py-SiO <sub>2</sub> and their corresponding fluorophores.....         | 9  |
| 9. Theoretical simulation parameters of finite-different time-domain (FDTD) method using PML absorbing boundary condition .....                                 | 10 |
| 10. The photobleaching and fluorescence quenching behavior of two sensing fluorophores films made from different concentration of tetrahydrofuran solvents..... | 11 |

## 1. Synthesis of fluorophore sensing units and hollow-shell silica microsphere

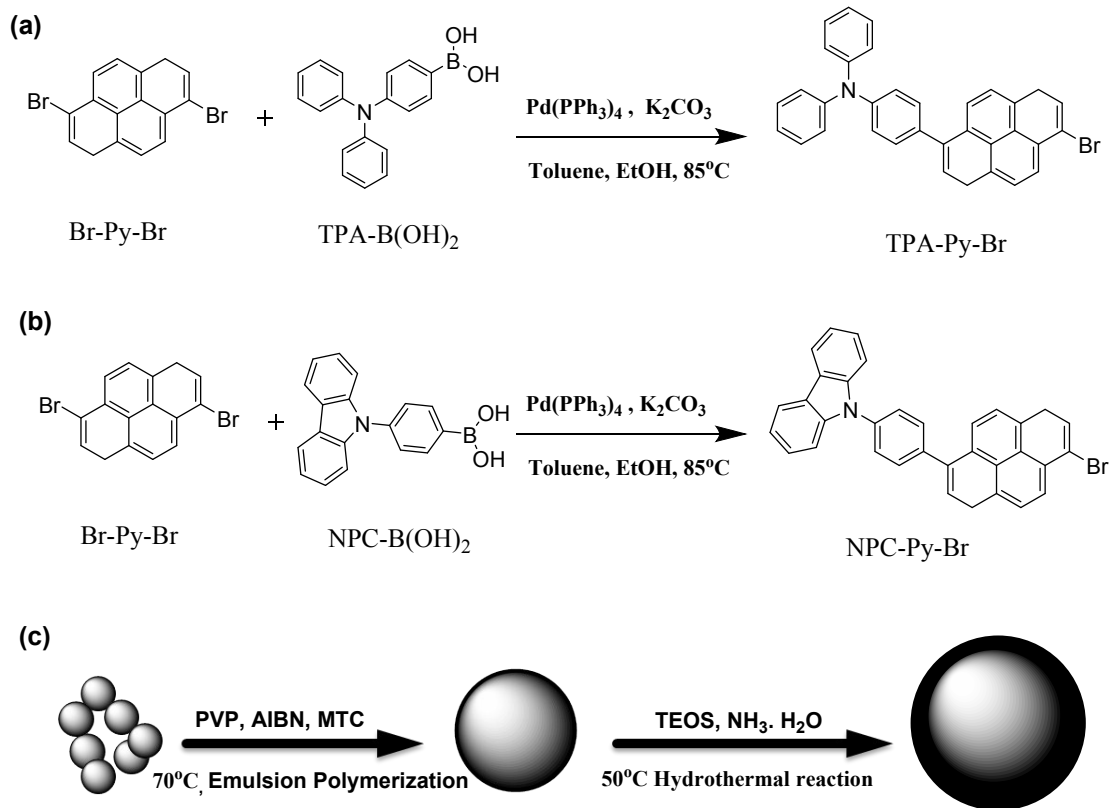

## 2. NMR and mass spectrum of two fluorophores TPA-Py-Br and NPC-Py-Br

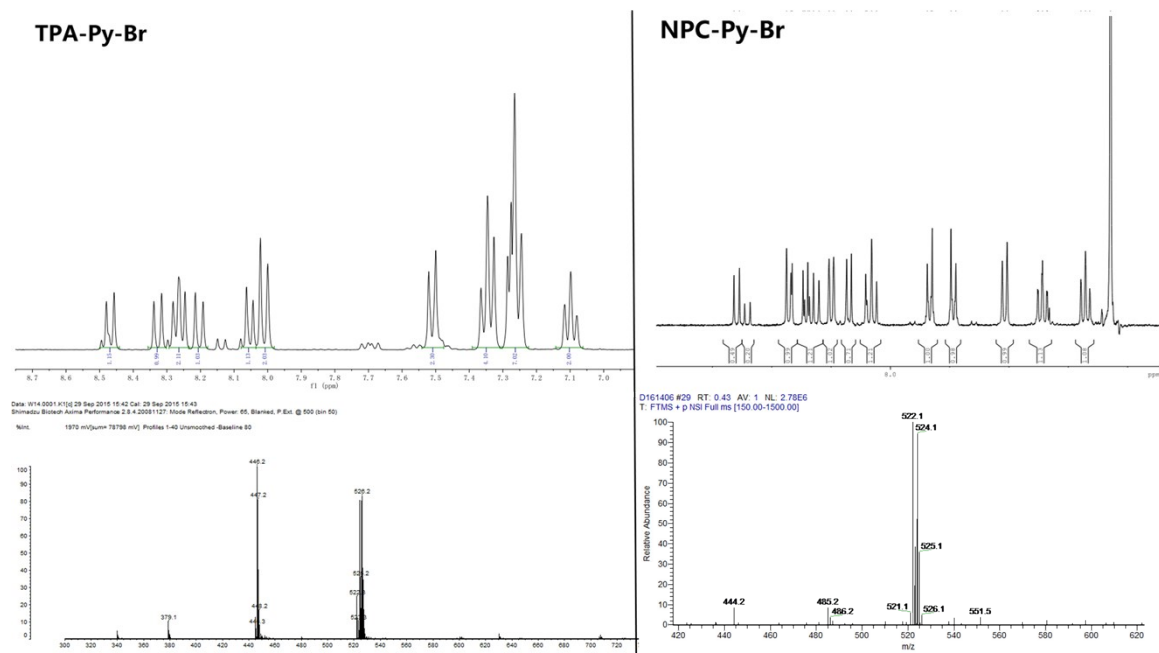

### 3. Fourier transforms infrared spectra of the hybrid silica microsphere

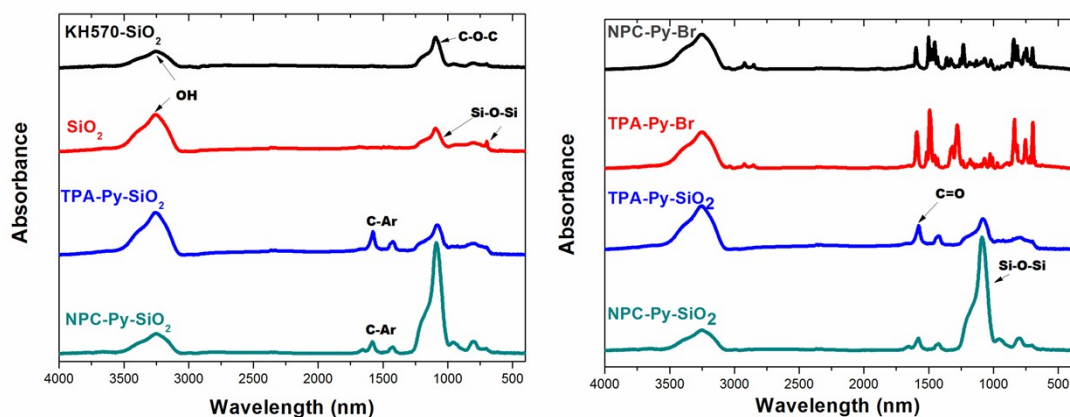

FT-IR was performed to prove the surface functional groups binding of the two hybrid microspheres, with the unmodified silica microsphere and KH-570-SiO<sub>2</sub> as contrast group. Compared with the spectrum of SiO<sub>2</sub>, that of KH-570-SiO<sub>2</sub> displays small absorbance peaks at 1657 cm<sup>-1</sup> and 950 cm<sup>-1</sup>, attributing to stretching and bending vibrations of -C=O group of KH-570.<sup>1, 2</sup> This indicates the silica microsphere is modified with reactive vinyl groups at the first step. Secondly, the two fluorescent silica microspheres show similar absorption peak position and appearance of the major bands. It is observed that the peaks of aromatic ring vibrations at 1450 cm<sup>-1</sup> and 1650 cm<sup>-1</sup> confirm the existence of corresponding fluorophores (TPA-Py and NPC-Py) in the hybrid materials. The band at 3256 cm<sup>-1</sup> is assigned to O-H stretching vibration on the surface of SiO<sub>2</sub>. The peak at 1080 cm<sup>-1</sup> is overlapped by the Si-O-Si and C-O-C stretching vibrations.<sup>2, 3</sup> All these results prove that TPA-Py and NPC-Py were grafted onto the surface of silica microsphere via covalent binding.

4. Solid-state  $^{29}\text{Si}$  and  $^{13}\text{C}$  cross-polarization magic-angle spinning NMR spectrum of (a) TPA-Py-SiO<sub>2</sub> and (b) NPC-Py-SiO<sub>2</sub> (using line fitting method with default parameters)

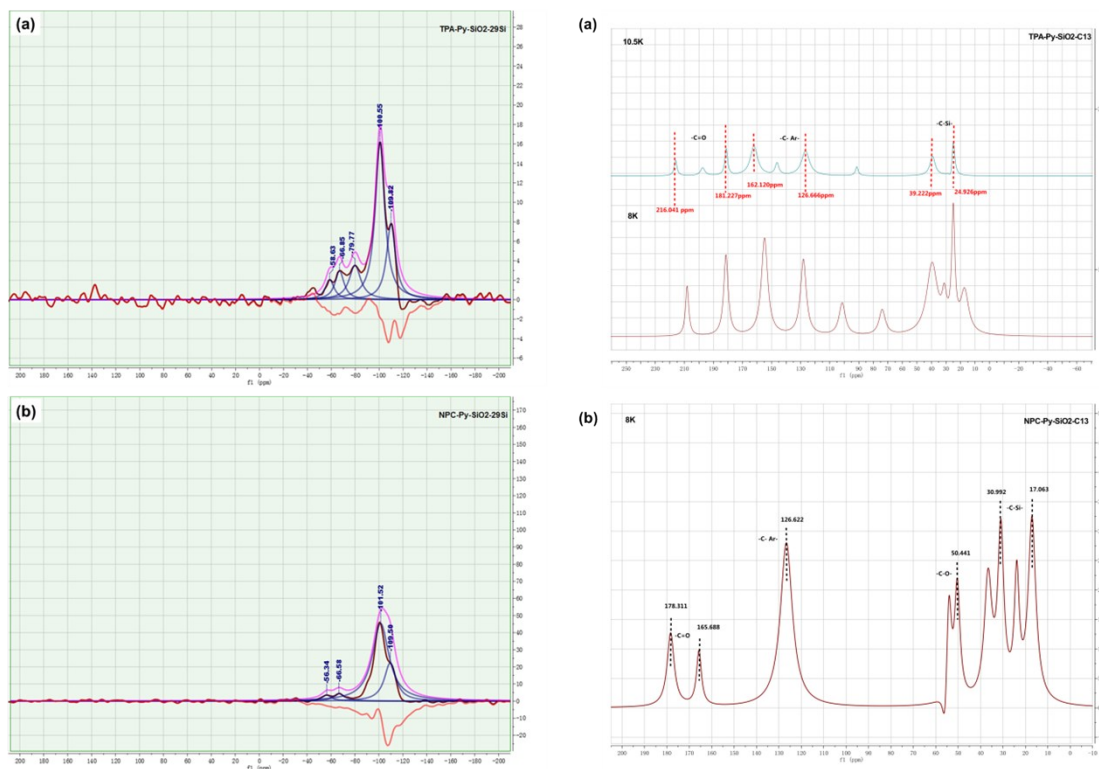

A further direct demonstration for the incorporation of TPA-Py and NPC-Py onto the surface of silica microsphere is given by the solid-state CP/MAS  $^{13}\text{C}$  NMR and  $^{29}\text{Si}$  NMR spectroscopy. As shown in Figure, signal peaks ranging from ca.162 to 126 ppm indicate the presence of structural units TPA-Py and NPC-Py. Both  $^{13}\text{C}$  NMR spectra show the peaks at 181.127 and 178.311 ppm are assigned to the C=O group<sup>4, 5</sup>. Besides, the formation of -C-Si bond is confirmed by the signal peaks at 39.22 and 24.92 ppm (right figure) and  $^{29}\text{Si}$  resonance peaks at  $\delta$  -58.63, -68.65 and -79.77 ppm (Left figure).<sup>5</sup> Similarly, two broad and overlapping peaks at  $\delta$  -56.34 and -66.58 ppm are assigned to the R-Si(HO)(OSi)<sub>2</sub> (T<sup>2</sup>) and R-Si(OSi)<sub>3</sub> (T<sup>3</sup>) organosiloxane species, respectively.<sup>3, 4</sup> These results are consistent with those obtained by means of FT-IR spectrum and certainly confirm the dye-functionalization of silica microspheres TPA-Py-SiO<sub>2</sub> and NPC-Py-SiO<sub>2</sub> is successful.

5. Sensing films of silica microspheres and their corresponding fluorophores by different preparation methods: (a) unmodified intact silica microsphere; (b) small fluorophores (TPA-Py); (c) dye-functionalized microsphere (TPA-Py-SiO<sub>2</sub>); (d) vinyl-modified microsphere with fluorophores

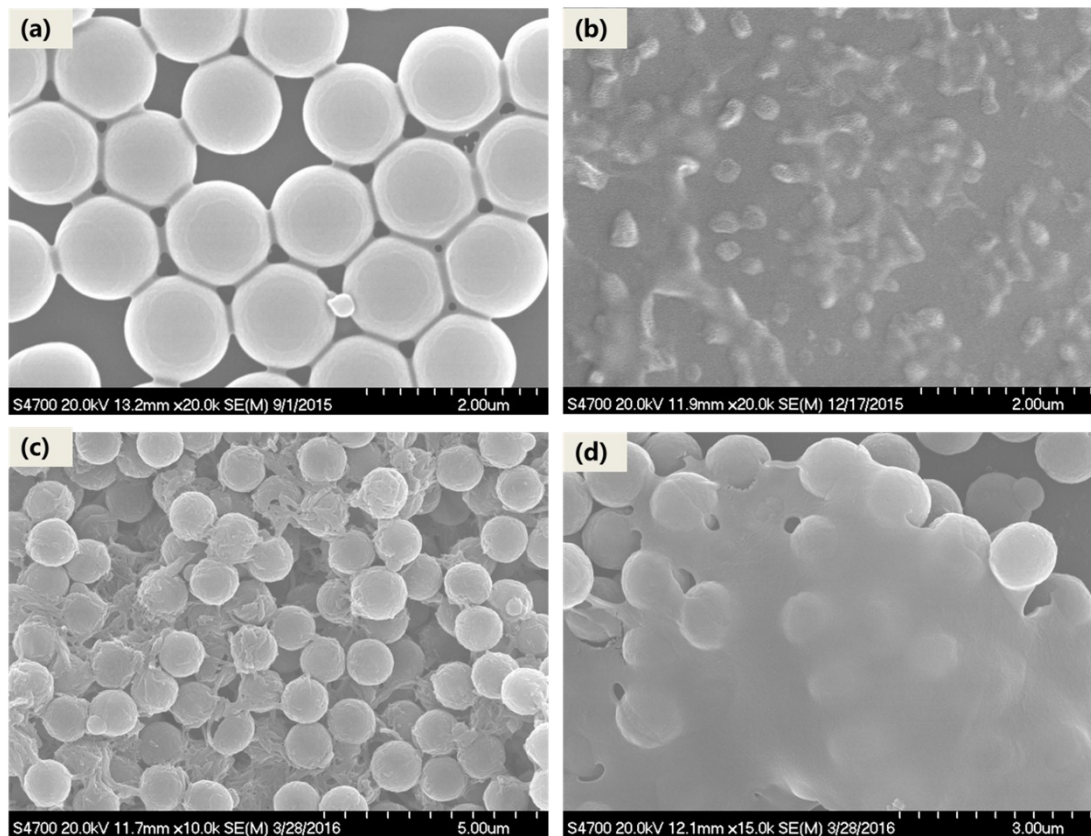

6. Comparison between dye-functionalized microsphere and vinyl-modified microsphere spin coated with fluorophore: (a: Normalized fluorescence spectrum (red:  $\lambda_{ex}=379\text{nm}$ ; blue:  $\lambda_{ex}=374\text{nm}$ ); b: Chromaticity diagram)

(a)

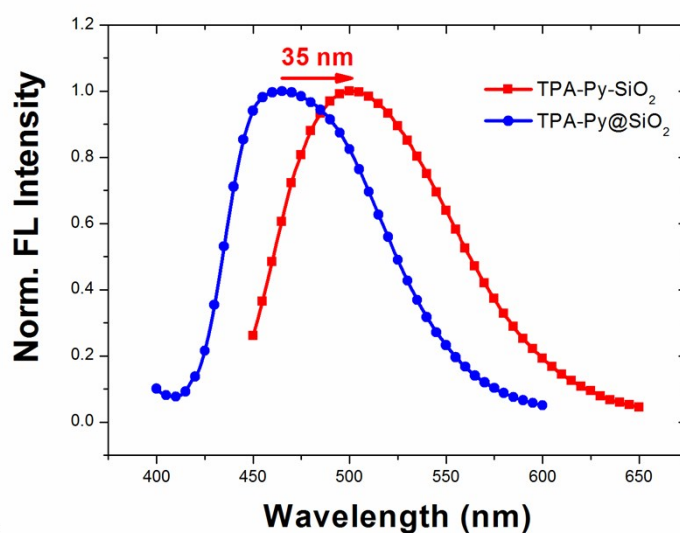

(b)

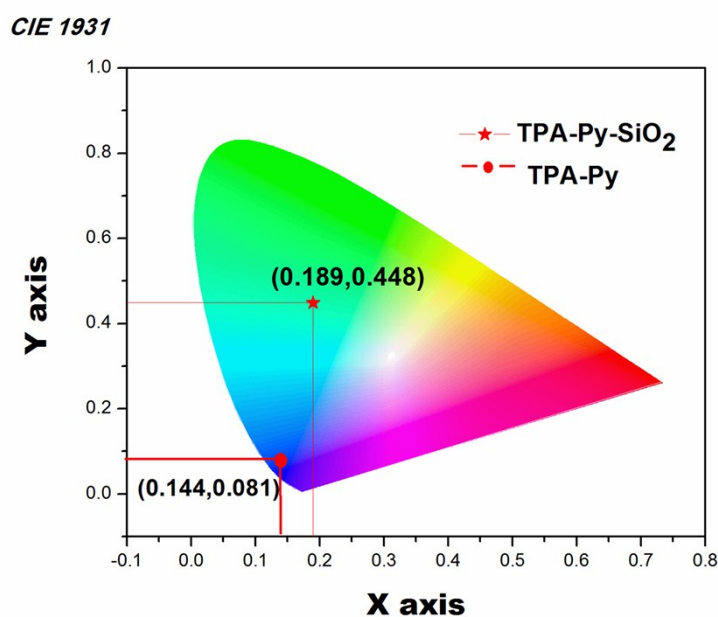

The fluorophore was proved to be covalently grafted on the surface of microsphere by the emission spectral shift compared with physically coated microsphere. It is because the fluorophores covalently linked with the vinyl group on the surface of silica may expand their conjugation length, thus contributing to the spectral shift<sup>6</sup>.

7. Fluorescent quenching efficiency (Red) and photobleaching behavior (Blue) of the silica-based sensing films: (a) TPA-Py-SiO<sub>2</sub> and (b) NPC-Py-SiO<sub>2</sub> by different film preparation methods.

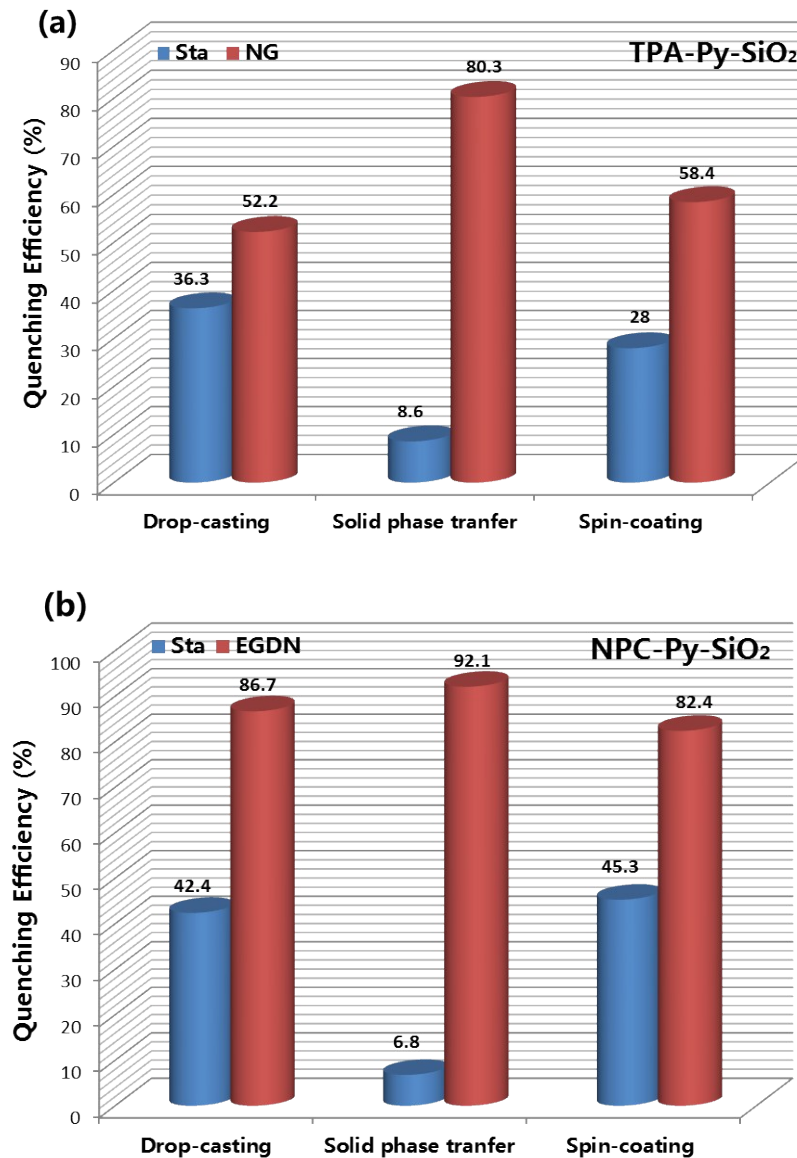

The films made by solid phase transfer are experiment group and those by drop-spin coating and spin coating methods serve as contrast group to prove the influence of chemical binding to the sensing properties of hybrid microsphere.



8. TGA curve of the hybrid silica-based microspheres (a) TPA-Py-SiO<sub>2</sub> and (b) NPC-Py-SiO<sub>2</sub> and their corresponding fluorophores under oxygen condition

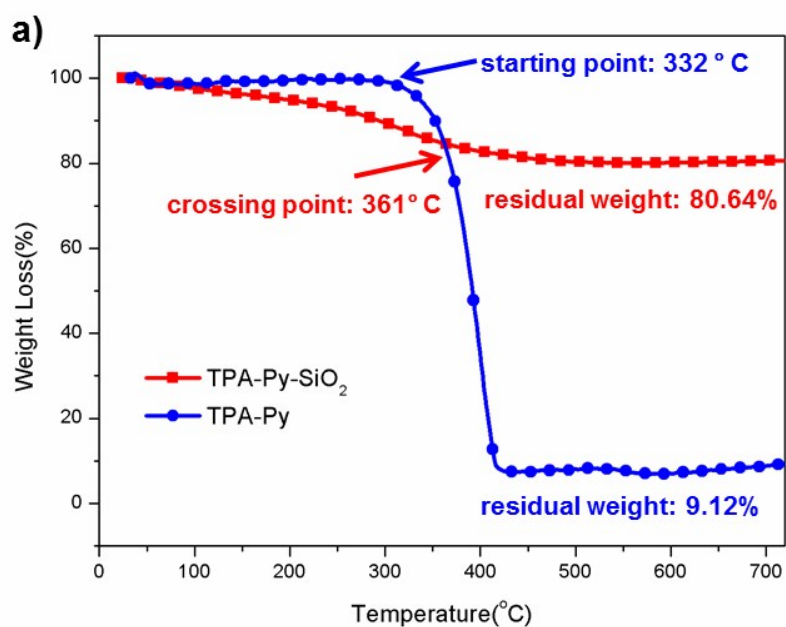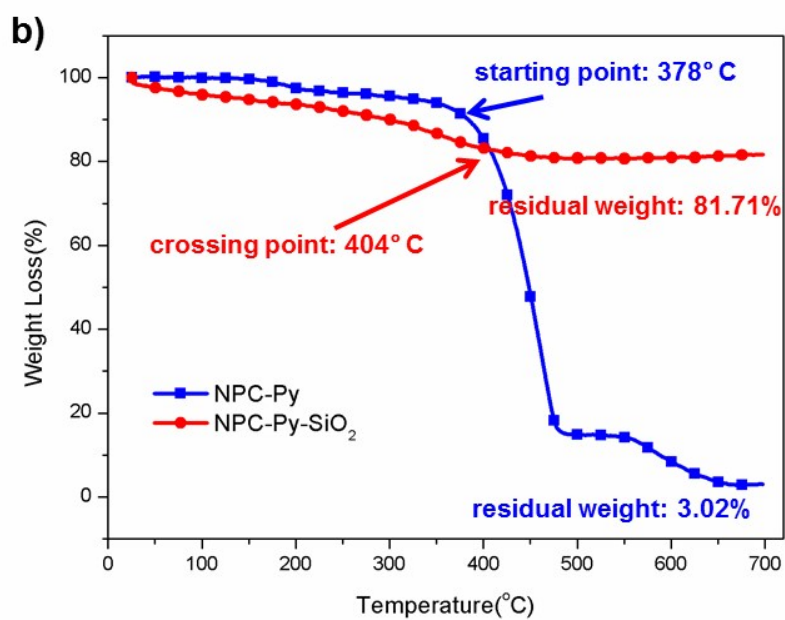

**9. Simulation Parameters of finite-different time-domain (FDTD) method using the perfectly matched layer (PML) absorbing boundary condition for the theoretical analysis of field distribution and resonance spectrum of the optical hybrid silica resonator microsphere**

| <b>Computation parameters</b>       | <b>Optimized value</b> |                   |
|-------------------------------------|------------------------|-------------------|
| Diameter                            | 1.9 $\mu\text{m}$      | 1.4 $\mu\text{m}$ |
| Wall Thickness                      | 150 nm                 | 100 nm            |
| Refractive Index <sup>7</sup>       | 1.7                    | 1.7               |
| Dielectric Constant <sup>7</sup>    | 2.3716                 | 2.3716            |
| Extinction Coefficient <sup>8</sup> | 4.54                   | 5.00              |
| Resonance Wavelength                | 513 nm                 | 483 nm            |
| Excitation Wavelength               | 393 nm                 | 372 nm            |
| Space Interval                      | 30 nm                  | 30 nm             |
| Peak Shift                          | 50 nm                  | 20 nm             |

10. The photobleaching (blue) of two sensing fluorophores films made from different concentration of tetrahydrofuran solvents and their fluorescence quenching behavior (red) upon explosive vapours

(a) TPA-Py Concentration VS. NG Sensing

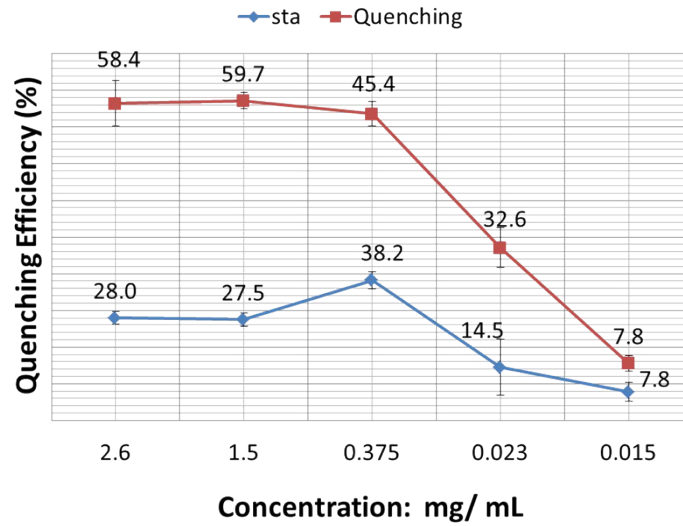

(b) NPC-Py Concentration VS. EGDN Sensing

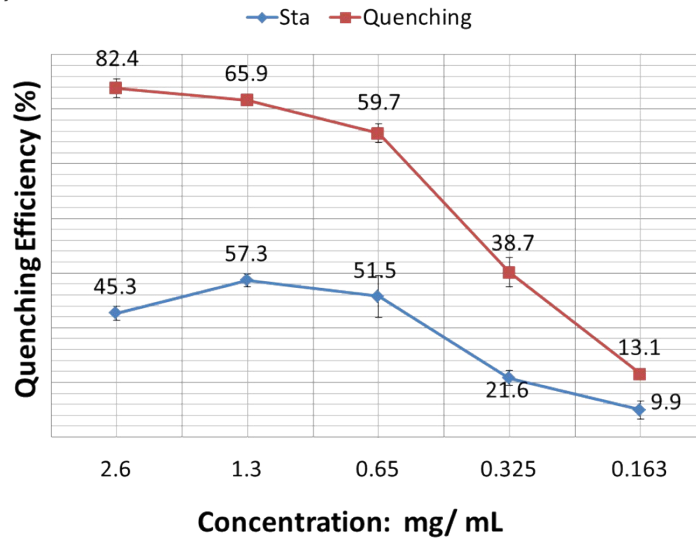

## REFERENCES

1. R. El-Debs, V. Dugas and C. Demesmay, *Journal of separation science*, 2013, **36**, 993-1001.
2. Y. S. Zhou, J. R. Yu, X. X. Wang, Y. Wang, J. Zhu and Z. M. Hu, *Fiber Polym*, 2015, **16**, 1772-1780.
3. R. Gong, H. Mu, Y. Sun, X. Fang, P. Xue and E. Fu, *Journal of Materials Chemistry B*, 2013, **1**, 2038.
4. Z. Zhou, A. W. Franz, M. Hartmann, A. Seifert, T. J. J. Muller and W. R. Thiel, *Chem Mater*, 2008, **20**, 4986-4992.
5. T. Asefa, M. J. MacLachlan, N. Coombs and G. A. Ozin, *Nature*, 1999, **402**, 867-871.
6. M. R. Foreman, J. D. Swaim and F. Vollmer, *Advances in optics and photonics*, 2015, **7**, 168-240.
7. H. R. Philipp, in *Handbook of Optical Constants of Solids*, Academic Press, Burlington, 1997, DOI: <http://dx.doi.org/10.1016/B978-012544415-6.50037-6>, pp. 719-747.
8. Y. Gao, W. Xu, D. Zhu, L. Chen, Y. Fu, Q. He, H. Cao and J. Cheng, *Journal of Materials Chemistry A*, 2015, **3**, 4820-4826.
